# Supplementary material
Source: Springer Nature journal article supplement (https://www.springermedizin.de/resource/supplementary/12936_2010_1332_MOESM1_ESM.pdf/9549540)

# Legend

- ★ Capital
- ✈ Airport
- ⊕ National referral hospital
- ⊕ Regional referral hospital

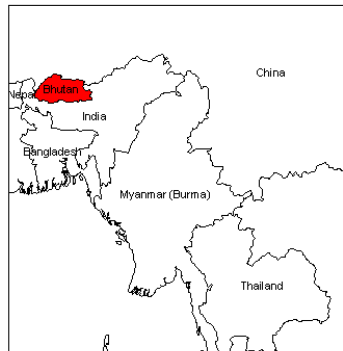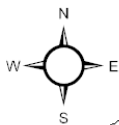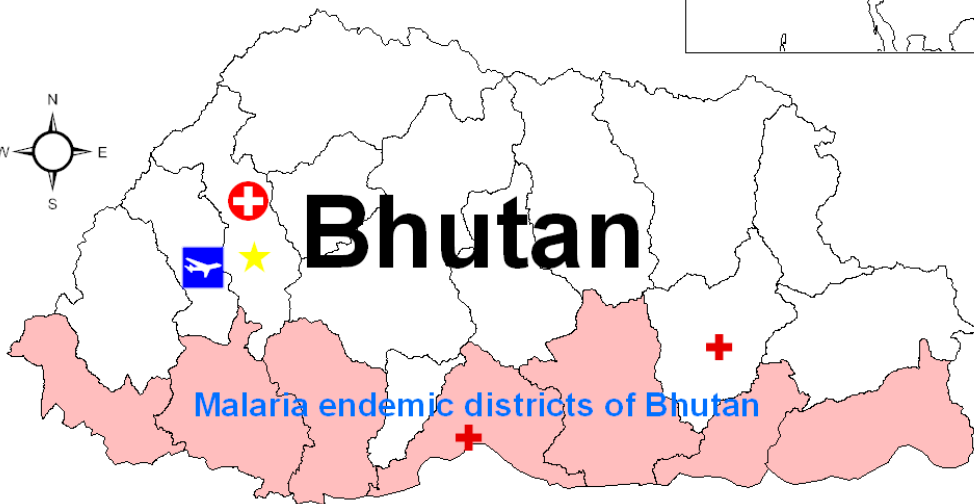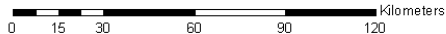

Supplement: MOESM1 [file 9549540]
